# 1 Evaluation of NGS-based approaches for SARS-CoV-2 whole genome characterisation

2 Caroline Charre<sup>1,2,3</sup>, Christophe Ginevra<sup>4,5</sup>, Marina Sabatier<sup>1,2,6</sup>, Hadrien Regue<sup>1,2</sup>, Grégory  
3 Destras<sup>1,2,6,7</sup>, Solenne Brun<sup>1,7</sup>, Gwendolyne Burfin<sup>1,7</sup>, Caroline Scholtes<sup>1,2,3</sup>, Florence  
4 Morfin<sup>1,2,6,7</sup>, Martine Valette<sup>1,7</sup>, Bruno Lina<sup>1,2,6,7</sup>, Antonin Bal<sup>1,2,6,7</sup> and Laurence Josset<sup>1,2,6,7</sup>

5 <sup>1</sup>Laboratoire de Virologie, Institut des Agents Infectieux (IAI), Hospices Civils de Lyon,  
6 Groupement Hospitalier Nord, Lyon cedex 4, France

7 <sup>2</sup>Université de Lyon, Université Claude Bernard Lyon 1 (UCBL1), Lyon

8 <sup>3</sup>Centre de recherche en cancérologie (CRCL), INSERM U1052- 69008, Lyon

9 <sup>4</sup>CIRI, Centre International de Recherche en Infectiologie, (Team pathogenesis of  
10 Legionella), Univ Lyon, Inserm, U1111, Université Claude Bernard Lyon 1, CNRS,  
11 UMR5308, ENS de Lyon, 69007, Lyon, France.

12 <sup>5</sup>Hospices Civils de Lyon, Centre National de Référence des Légionelles, Lyon, France

13 <sup>6</sup>Université de Lyon, Virpath, CIRI, INSERM U1111, CNRS UMR5308, ENS Lyon,  
14 Université Claude Bernard Lyon 1, Lyon, France

15 <sup>7</sup>Centre National de Référence France-Sud des Virus des Infections Respiratoires, Hospices  
16 Civils de Lyon, Groupement Hospitalier Nord, Lyon cedex 4, France

## 18 Abstract

19  
20 Since the beginning of the COVID-19 outbreak, SARS-CoV-2 whole-genome sequencing  
21 (WGS) has been performed at unprecedented rate worldwide with the use of very diverse  
22 Next Generation Sequencing (NGS) methods. Herein, we compare the performance of four  
23 NGS-based approaches for SARS-CoV-2 WGS. Twenty four clinical respiratory samples  
24 with a large scale of Ct values (from 10.7 to 33.9) were sequenced with four methods. Three  
25 used Illumina sequencing: an in-house metagenomic NGS (mNGS) protocol and two newly  
26 commercialized kits including a hybridization capture method developed by Illumina (DNA  
27 Prep with Enrichment kit and Respiratory Virus Oligo Panel, RVOP) and an amplicon  
28 sequencing method developed by Paragon Genomics (CleanPlex SARS-CoV-2 kit). We also  
29 evaluated the widely used amplicon sequencing protocol developed by ARTIC Network and  
30 combined with Oxford Nanopore Technologies (ONT) sequencing. All four methods yielded  
31 near-complete genomes (>99%) for high viral loads samples, with mNGS and RVOP  
32 producing the most complete genomes. For mid viral loads, 2/8 and 1/8 genomes were  
33 incomplete (<99%) with mNGS and both CleanPlex and RVOP, respectively. For low viral  
34 loads (Ct ≥25), amplicon-based enrichment methods were the most sensitive techniques  
35 yielding complete genomes for 7/8 samples. All methods were highly concordant in terms of  
36 identity in complete consensus sequence. Just one mismatch in two samples was observed in  
37 CleanPlex vs the other methods, due to the dedicated bioinformatics pipeline setting a high  
38 threshold to call SNP compared to reference sequence. Importantly, all methods correctly  
39 identified a newly observed 34-nt deletion in ORF6 but required specific bioinformatic  
40 validation for RVOP. Finally, as a major warning for targeted techniques, a default of  
41 coverage in any given region of the genome should alert to a potential rearrangement or a  
42 SNP in primer annealing or probe-hybridizing regions and would require regular updates of  
43 the technique according to SARS-CoV-2 evolution.

## 44 **Introduction**

45 A novel human betacoronavirus, Severe Acute Respiratory Syndrome Coronavirus 2 (SARS-  
 46 CoV-2), emerged in China in December 2019, rapidly spreading worldwide and resulting in  
 47 the coronavirus disease 2019 (COVID-19) pandemic (1). Whole-genome sequencing (WGS)  
 48 of SARS-CoV-2 has played a major role since the onset of the pandemic. Notably WGS has  
 49 contributed to design specific RT-PCRs (2), antiviral strategies (3), and vaccine candidates  
 50 (4). SARS-CoV-2 WGS also allowed to explore lineage transmission and might be useful to  
 51 assess the effectiveness of intervention measures (5–8). Furthermore SARS-CoV-2 genomic  
 52 surveillance allowed the characterization of some mutations for which the impact on virulence  
 53 and transmissibility needs to be confirmed (9–11). SARS-CoV-2 WGS is performed at an  
 54 unprecedented rate worldwide with the use of very diverse Next Generation Sequencing  
 55 (NGS) methods. Viral metagenomic NGS (mNGS) enabled early sequencing of the SARS-  
 56 CoV-2 genome (1) and is the method routinely used in the French National Reference Centre  
 57 for Respiratory Viruses (NRC, Lyon, France). However, this method lacks sensitivity and  
 58 cannot produce whole genomes for low viral load samples, except using a very high depth of  
 59 sequencing (10). Targeted methods such as amplicon- or capture-based enrichments are  
 60 promising candidates to overcome this issue. A formal comparative study of these different  
 61 approaches has not been performed so far. Herein, we aimed to assess performance of four  
 62 NGS-based approaches for SARS-CoV-2 WGS. Three used Illumina sequencing: an in-house  
 63 metagenomic NGS (mNGS) protocol and two newly commercialized kits including a  
 64 hybridization capture method developed by Illumina and an amplicon sequencing method  
 65 developed by Paragon Genomics. We also assessed a widely used amplicon sequencing  
 66 protocol developed by the ARTIC network and combined with Oxford Nanopore  
 67 Technologies (ONT) sequencing (7,12). The present evaluation covers experimental process  
 68 as well as the associated bioinformatic solutions recommended for each technique.

69 Importantly, this evaluation included two samples with a newly observed 34-nt deletion in  
70 ORF6 [Queromes et al, in preparation] in order to assess the capacity to detect large  
71 modification in SARS-CoV-2 genome.

## 72 **Methods**

### 73 **Sample selection**

74 A total of 24 clinical samples (nasopharyngeal swab) with a broad range of representative  
75 SARS-CoV-2 cycle threshold (Ct) values (from 10.7 to 33.0) were selected for sequencing.  
76 We defined 3 groups of samples: a low Ct values group ( $Ct < 20$ ), a medium Ct values group  
77 ( $20 \leq Ct < 25$ ) and high Ct values group ( $Ct \geq 25$ ). Each sample was tested with 2 real time  
78 reverse-transcriptase polymerase chain reactions (RT-PCR) targeting distinct RdRp gene  
79 regions (Institut Pasteur assay, Paris, France (13)). Total nucleic acid extraction was  
80 performed with easymag platform (bioMérieux, Lyon, France). Samples used in this study  
81 were collected as part of approved ongoing surveillance conducted by the NRC at the  
82 Hospices Civils de Lyon. The investigations were carried out in accordance with the General  
83 Data Protection Regulation (Regulation (EU) 2016/679 and Directive 95/46/EC) and the  
84 French data protection law (Law 78–17 on 06/01/1978 and Décret 2019–536 on 29/05/2019).

### 85 **Sequencing approaches and technologies**

#### 86 **Illumina sequencing**

##### 87 **Viral metagenomics (mNGS)**

88 DNase treatment (Life Technologies, Carlsbad, CA, USA) was performed after nucleic acid  
89 extraction in order to increase sensitivity of RNA virus detection and overcome human  
90 contamination (14). Nucleic acids were randomly amplified using the WTA2 kit (WTA2,  
91 Sigma-Aldrich, Darmstadt, Germany) and libraries were prepared using the Illumina Nextera  
92 XT kit (Illumina, San Diego, CA, USA). This in-house approach is routinely used to perform

93 WGS SARS-CoV-2 genomic surveillance at the NRC (10,15) for samples with a Ct value  
94 <20.

### 95 **Hybrid capture-based target enrichment**

96 Hybrid capture-based approach was performed using the Illumina DNA Prep with Enrichment  
97 kit and Illumina Respiratory Virus Oligo Panel (RVOP) V1.0. Briefly, double stranded cDNA  
98 synthesis was performed from DNase pretreated total nucleic acid extracts using the  
99 NEBNext® Ultra™ II RNA First Strand Synthesis Module and NEBNext® Ultra™ II Non-  
100 Directional RNA Second Strand kit (New England Biolabs, MA, USA). The enrichment was  
101 based on a hybridization step with a respiratory viruses biotinylated adjacent oligoprobes  
102 panel (16) recently expanded to include SARS-CoV-2.

### 103 **Amplicon-based target enrichment**

104 We implemented the CleanPlex SARS-CoV-2 panel (Paragon Genomics, Inc, Hayward, CA,  
105 USA) protocol for target enrichment and library preparation (17). In short, from reverse-  
106 transcribed RNA, multiplex PCR reactions were performed using 343 pairs of primers  
107 separated into two pools covering the entire genome of SARS-CoV-2 ranging from 116bp to  
108 196bp, with a median size of 149 bp. Illumina indexes were introduced by PCR.

109 For these three approaches the prepared libraries were sequenced on an Illumina NextSeq™  
110 550 with mid-output 2x150 bp (mNGS and CleanPlex) or 2x75 bp (RVOP) flow cells.

### 111 **ONT sequencing using amplicon-based target enrichment**

112 We tested a multiplexed PCR amplicon approach implementing the ARTIC Network nCoV-  
113 2019 sequencing protocol slightly modified by ONT (Oxford Nanopore Technologies,  
114 Oxford, UK) for better performance. The multiplex PCR primers set v3 was used to span the  
115 whole genome (12). Briefly, synthesized cDNA was used as template and tiling 400nt-  
116 amplicons with 20 base pairs overlaps (not including primers) were generated using two pools  
117 of primers for 35 cycles. Samples were multiplexed by using the native barcode kits from

ONT (EXP-NBD104 and EXP-NBD114). The library was prepared using the SQK-LSK109 kit and then sequenced on a FLO-MIN106 (R9.4.1) flow cell, multiplexing 24 samples per run.

# **Sequencing data analysis**

mNGS data were analysed with an in-house pipeline. Briefly, low quality and human reads were filtered out (dehosting) and remaining reads were aligned to the SARS-CoV-2 reference genome (isolate Wuhan-Hu-1, EPI\_ISL\_402125) using the BWA-MEM (v0.7.15-r1140) algorithm. Consensus sequences were generated through a simple majority rule using custom perl script. These sequences were used as the patients' own mapping reference for further realignment of the reads. Final consensus sequence was called at 10x using no-clip alignment. Visual inspection of read alignments was performed using Integrative Genomics Viewer (IGV) (18) around regions with large drop in coverage to detect and define potential deletions. For the CleanPlex SARS-CoV-2 amplicon approach, data analysis was performed according to the supplier's recommendations with a pipeline developed by Sophia Genetics (V1) (17). Sequencing data from the RVOP capture approach were parsed using the Illumina Dynamic Read Analysis for GENomics (DRAGEN; v3.5.13; Illumina) Bio-IT Platform. Finally, ONT sequencing data were analysed by implementing the recommended bioinformatics developed by ARTIC and available online (v1.1.0) (19). Briefly, basecalling and demultiplexing were performed using Guppy high accuracy models (v3.5.2). Local alignment was performed using Minimap2 (v 2.17) and variant calling with nanopolish (v0.13.2). Five parameters were specifically evaluated and compared: coverage metrics such as depth and breadth of coverage at 10x, number of SNPs between methods after pairwise alignment of consensus sequences, and detection of a particular 34nt-deletion detected with our in-house reference mNGS method. The proportion (%) of genome coverage are presented as medians with interquartile ranges [IQR] and compared using the non-parametric Friedman test.

# **Results**

## **Sensitivity assessment of four SARS-CoV-2 sequencing approaches**

Four widely used NGS methods were evaluated: an unbiased mNGS approach, and three targeted approaches based on hybridization capture (RVOP) or amplicon sequencing (CleanPlex and ARTIC-ONT). For high viral loads ( $C_t < 20$ ), the 4 sequencing approaches yielded almost-complete genome ( $> 99\%$  covered at 10x) for all samples. A significant difference in genome coverage distribution ( $p < 0.001$ ) was found; the highest median of coverage was for RVOP and mNGS (Table 1). For mid  $C_t$  samples, one sample sequenced with RVOP and two samples sequenced with mNGS had a genome coverage below 99% (93.4% with RVOP, 72.6% and 56.5% with mNGS, respectively).

Among samples with low viral loads ( $C_t \geq 25$ ), significant discrepancies in genome coverage were observed between methods ( $p = 0.005$ ); 8.8% median coverage in samples sequenced with mNGS, 92.0% for RVOP, and highest median coverage were obtained with amplicon sequencing (99.4%, CleanPlex; 99.6%, ARTIC-ONT).

While RVOP and mNGS enabled to generate the complete genome (maximum coverage was 100% for highest viral loads), amplicon-based target enrichment did not allow to cover SARS-CoV-2 genome ends, as expected by considering the design of ARTIC-ONT and CleanPlex protocols. The highest coverage was 99.6% and 99.7% for ARTIC-ONT and CleanPlex, respectively.

Irrespective of  $C_t$  value, RVOP provided an even depth of coverage throughout the genome, while uneven depth of coverage was obtained with mNGS and marked drops in sequencing depth were observed for CleanPlex (Figure 1). We did not interpret the evenness of depth of coverage for ARTIC-ONT as the dedicated pipeline limits the depth at 400x. These drops corresponded to amplicons that were poorly amplified: from 5,159 to 5,199 (drop # 1), from 14,430 to 14,505 (drop # 2), from 19,337 to 19,399 (drop # 3), and from 22,641 to 22,715

(drop # 4; Figure 1). Regarding low and mid Ct samples, 1, 3, and 8 had a coverage <10x at drops # 2, #1, and # 4, respectively. Importantly none of these regions involved crucial positions used to define the Nextstrain major clades (20).

## **Comparison of complete genome consensus sequence**

Almost-complete genomes generated with the 4 methods were further compared to define accuracy of each approach (Figure 2). Of note, 9, 7, and 3 samples sequenced, respectively, with mNGS, RVOP and CleanPlex were excluded of the analysis due to a coverage <99% at 10x, vs 1 sample for ARTIC-ONT protocol. For all other samples, all consensus sequences were strictly identical, expect for 2 samples for which CleanPlex led to one mismatch compared to the other methods (sample # 1, position 280086; sample # 20, position 11083). By analysing VCF files, these 2 positions corresponded to SNPs (G280086T, G11083T) with variant frequency <70% which is the threshold set for calling a SNP in Sophia Genetics pipeline while other pipelines set this threshold at 50%.

## **Performance of the methods for the detection of a large deletion in SARS-CoV-2 genome**

A 34 nt-deletion in the ORF6 at loci 27266 was detected in 2 samples (samples # 7 and # 8) by all the evaluated approaches both in alignment files and consensus sequences. For RVOP, it is noteworthy that DRAGEN output alignment files showed an absence of coverage in the region but there were no spanning reads to visualise the breakpoint of the deletion. However, DRAGEN output variant calling files clearly highlighted the 34 nt-deletion as well as the final consensus sequence for both samples. Using Minimap2 as aligner, the deletion was clearly identified with reads spanning the breakpoint of the deletion on the reference genome (Supplementary figure 1).



# **Discussion**

We present herein the evaluation of 4 representative NGS-based approaches for SARS-CoV-2 whole genome characterisation. Unbiased mNGS is the most appropriate method to identify novel emerging pathogens such as SARS-CoV-2 (1,21) but did not produce all WGS for mid and low Ct values samples in the present study. In contrast, the three targeted methods evaluated herein exhibited higher sensitivity compared to mNGS by reaching a high proportion of the genome covered. In particular, amplicon-based target enrichment using CleanPlex or ARTIC-ONT was the most sensitive approach and allowed WGS of samples with Ct up to 33.9. Although not reported herein, amplicon-based target enrichment can be impacted by SNP or indels located within primer-annealing regions even if their tiling amplicon designs (instead of adjacent amplicon designs) aims to reduce the impact of such modifications. With SARS-CoV-2 evolving, primers for amplicon-based target enrichment need to be constantly updated, as it has been done for ARTIC-ONT (v3) (22). Such updates will be important for CleanPlex as we have observed coverage dropout issues in 4 regions of the genome irrespective of Ct value, suggesting potential mismatches in primer-annealing regions that may lead to variation in the optimal annealing temperature and thus to a decrease in the amplification efficiency.

All 4 methods were highly concordant in terms of identity in complete consensus sequence. Just one mismatch in two samples was observed in CleanPlex *vs* the other methods, due to the dedicated pipeline setting very a high threshold to call SNP compared to reference genome. Considering the very low evolution rate of this virus that can be explained by the editing function of its polymerase, just one mutation can have high repercussions in terms of evolutionary assessment.

Furthermore, a novel 34nt-deletion in the ORF6 previously observed with our in-house mNGS method, was detected by the two evaluated tiling amplicon sequencing methods



(ARTIC and CleanPlex). However larger deletions spanning two primer annealing regions may arise and would be difficult to define using amplicon-based target enrichment methods. Missing regions with no coverage should be carefully investigated using other methods. The 34nt-deletion was also detected using RVOP despite an adjacent oligoprobes design. As the oligoprobe set is larger than the primer panel used in tiling amplicons protocols, a more comprehensive profiling of regions is obtained independently of genomic rearrangement. Moreover, a major advantage of this capture protocol, is the enrichment of other respiratory viruses that enables to detect coinfections (16).

The present study does have several limitations. First, the 4 methods were tested on a limited number of European samples, all affiliated to the lineage B1, according to the Pangolin classification (23); the present evaluation should be confirmed in larger studies including other lineages in order to be more representative of the global ecology of this emerging virus. As SARS-CoV-2 sequencing is an expanding market and other methods has been published (24–26) or are probably under development, the present study is not exhaustive. However, the approaches selected herein are representative of the methods mostly used during pandemics and are easy to implement in a diagnostic laboratory. As mentioned above, dedicated bioinformatic processes have been implemented as recommended by suppliers. Except for RVOP for which we compared the aligner using in DRAGEN and minimap2, we chose not to perform a comparison of the bioinformatic tools. In this context, further bioinformatic evaluations are needed especially concerning parameters such as the variant frequency threshold for calling SNP compared to reference sequence, as well as the minimum depth for calling consensus. Additionally, *de novo* assembly should be evaluated as it may provide better assessment of rearrangements such as large deletions, insertions and duplications that can be missed by classical alignment analyses, but this method is time-consuming and may not be appropriate for genomes with low coverage. More broadly, a repeatability test is

mandatory to comfort results obtained from the present evaluation. Finally, cost effectiveness and turnaround time were not assessed in this study considering that many parameters such as laboratory equipment and prices negotiated with suppliers may affect results.

Beyond these limitations, the data presented herein are useful for clinical and research teams who want to implement SARS-CoV-2 sequencing and chose the most suitable protocol according to the application. To summarise, mNGS remains the gold standard for samples with high viral load to obtain a maximum of information without any bias. For low and mid Ct values, RVOP leads to very high coverage as well, enabling genome end sequencing, contrary to amplicon methods. For higher Ct values, amplicon-based enrichment are a very interesting alternative, in particular ARTIC-ONT protocol that did not show any dropout issues in this present evaluation. However, as a reminder, default of coverage in any given region of the genome should alert to a potential rearrangement or an SNP in primer annealing or probe-hybridizing regions and require regular updates according to SARS-CoV-2 evolution.

## Acknowledgements

We would like to thank all the patients, laboratory technicians and clinicians who contributed to this investigation. We are also grateful to Philip Robinson (DRCI, Hospices Civils de Lyon) for help in manuscript preparation.

## Statement of data availability

Data will be deposited on SRA database prior to publication.

## Fundings

Dedicated reagents were provided by Illumina and Paragon Genomics.

## Legends

**Table 1.** Proportion of coverage throughout the SARS-CoV-2 genome at 10x according to evaluated methods. Cycles threshold (Ct) values were determined using the RdRp Institute Pasteur RT-PCR assay (IP4). Using an R script, these proportions (%) were calculated from depth files generated by bedtools from output aligned bam files of each specific-method pipeline. The percentage of genome coverage are presented as medians with interquartile ranges [IQR] and compared using the non-parametric Friedman test.

**Figure 1.** Plots of coverage according to evaluated methods and Cycle threshold (Ct) values groups. Using an R script, these plots were constructed via ggplot2 from depth files generated by bedtools from output aligned bam files of each specific-method pipeline. Of note, ARTIC-ONT pipeline limits the depth at 400x, the real depth is not represented herein.

**Figure 2.** Mismatch count between consensus sequences generated by each method compared 2 by 2 for each sample. These matrices were generated only from consensus with determined bases for more than 99% of the genome. If one sequence of the two had more than 1% of undetermined bases (N), comparison was not assessed, grey tiles. Blue tiles correspond to perfect identity and orange tile correspond to mismatches, the number of mismatches is indicated inside the tile. Matrices were generated with an R script using Decipher (alignment), ape (distance matrices) and ggplot2 (charts) libraries. Of note, undetermined bases and deletions were not considered in the calculation of mismatches.

**Supplementary Figure 1.** Visualisation by Integrative Genomics Viewer (IGV) of the 34-nt deletion in the ORF6 highlighted from capture sequencing data of one of the two samples concerned (sample # 8). Plot of coverage from DRAGEN pipeline is represented in grey with

292 conventional numbering systems for SARS-CoV-2 reference (MN908947.3). Depth at  
 293 position 27079 is indicated into brackets. Details of output alignment files from DRAGEN did  
 294 not show any reads (grey) overlapping the deletion contrary to those obtained using  
 295 Minimap2 as aligner (black line within read).

## References

1. Zhu N, Zhang D, Wang W, Li X, Yang B, Song J, et al. A Novel Coronavirus from Patients with Pneumonia in China, 2019. *N Engl J Med*. 2020 Feb 20;382(8):727–33.
2. Corman VM, Landt O, Kaiser M, Molenkamp R, Meijer A, Chu DK, et al. Detection of 2019 novel coronavirus (2019-nCoV) by real-time RT-PCR. *Eurosurveillance* [Internet]. 2020 Jan 23 [cited 2020 May 8];25(3). Available from: <https://www.eurosurveillance.org/content/10.2807/1560-7917.ES.2020.25.3.2000045>
3. Dai W, Zhang B, Su H, Li J, Zhao Y, Xie X, et al. Structure-based design of antiviral drug candidates targeting the SARS-CoV-2 main protease. *Science*. 2020 Apr 22 [cited 2020 May 24]; Available from: <https://science.sciencemag.org/content/early/2020/04/21/science.abb4489>
4. Kames J, Holcomb DD, Kimchi O, DiCuccio M, Hamasaki-Katagiri N, Wang T, et al. Sequence analysis of SARS-CoV-2 genome reveals features important for vaccine design. *bioRxiv*. 2020 Mar 31;2020.03.30.016832.
5. Grubaugh ND, Ladner JT, Lemey P, Pybus OG, Rambaut A, Holmes EC, et al. Tracking virus outbreaks in the twenty-first century. *Nat Microbiol*. 2019 Jan;4(1):10–9.
6. Oude Munnink BB, Nieuwenhuijse DF, Stein M, O'Toole Á, Haverkate M, Mollers M, et al. Rapid SARS-CoV-2 whole genome sequencing for informed public health decision making in the Netherlands. *Genomics*; 2020 Apr [cited 2020 May 27]. Available from: <http://biorxiv.org/lookup/doi/10.1101/2020.04.21.050633>
7. Consortium TC-19 GU (COG-U, Robson S, Scarlett G, Bourgeois YXC, Beckett AH. An integrated national scale SARS-CoV-2 genomic surveillance network. *Lancet Microbe*. 2020 Jun 2 [cited 2020 Jun 18]; Available from: [https://researchportal.port.ac.uk/portal/en/publications/an-integrated-national-scale-sarscov2-genomic-surveillance-network\(d537cd78-4d18-4935-90c3-2645ddf9b34f\).html](https://researchportal.port.ac.uk/portal/en/publications/an-integrated-national-scale-sarscov2-genomic-surveillance-network(d537cd78-4d18-4935-90c3-2645ddf9b34f).html)
8. Preliminary analysis of SARS-CoV-2 importation & establishment of UK transmission lineages. *Virological*. 2020 [cited 2020 Jun 18]. Available from: <https://virological.org/t/preliminary-analysis-of-sars-cov-2-importation-establishment-of-uk-transmission-lineages/507>
9. Batty EM, Kochakarn T, Panthan B, Kumpornsin K, Jiaranai P, Wangwiwatsin A, et al. Genomic surveillance of SARS-CoV-2 in Thailand reveals mixed imported populations, a local lineage expansion and a virus with truncated ORF7a. *medRxiv*. 2020 May 25;2020.05.22.20108498.
10. Bal A, Destras G, Gaymard A, Bouscambert-Duchamp M, Valette M, Escuret V, et al. Molecular characterization of SARS-CoV-2 in the first COVID-19 cluster in France reveals an amino acid deletion in nsp2 (Asp268del). *Clin Microbiol Infect*. 2020 Mar 28 [cited 2020 Jun 18]; Available from: <http://www.sciencedirect.com/science/article/pii/S1198743X20301658>
11. Holland LA, Kaelin EA, Maqsood R, Estifanos B, Wu LI, Varsani A, et al. An 81 nucleotide deletion in SARS-CoV-2 ORF7a identified from sentinel surveillance in Arizona (Jan-Mar 2020). *J Virol*. 2020 May 1 [cited 2020 Jun 18]; Available from: <https://jvi.asm-org.proxy.insermbiblio.inist.fr/content/early/2020/04/30/JVI.00711-20>
12. <https://artic.network/ncov-2019>. (accessed on 24 March 2020).
13. [https://www.who.int/docs/default-source/coronaviruse/real-time-rt-pcr-assays-for-the-detectionof-sars-cov-2-institut-pasteur-paris.pdf?sfvrsn=3662fcb6\\_2](https://www.who.int/docs/default-source/coronaviruse/real-time-rt-pcr-assays-for-the-detectionof-sars-cov-2-institut-pasteur-paris.pdf?sfvrsn=3662fcb6_2) (accessed on 24 March 2020).
14. Bal A, Pichon M, Picard C, Casalegno JS, Valette M, Schuffenecker I, et al. Quality control implementation for universal characterization of DNA and RNA viruses in clinical respiratory samples using single metagenomic next-generation sequencing workflow. *BMC Infect Dis*. 2018 Dec;18(1):1–10.

15. Danesh G, Elie B, Michalakis Y, Sofonea MT, Bal A, Behillil S, et al. Early phylodynamics analysis of the COVID-19 epidemics in France. medRxiv. 2020 Jun 4;2020.06.03.20119925.
16. O’Flaherty BM, Li Y, Tao Y, Paden CR, Queen K, Zhang J, et al. Comprehensive viral enrichment enables sensitive respiratory virus genomic identification and analysis by next generation sequencing. Genome Res. 2018 Jun;28(6):869–77.
17. [https://www.paragongenomics.com/wp-content/uploads/2020/03/UG4001-01\\_-CleanPlex-SARS-CoV-2-Panel-User-Guide.pdf](https://www.paragongenomics.com/wp-content/uploads/2020/03/UG4001-01_-CleanPlex-SARS-CoV-2-Panel-User-Guide.pdf). (accessed on 24 March 2020).
18. Robinson JT, Thorvaldsdóttir H, Winckler W, Guttman M, Lander ES, Getz G, et al. Integrative genomics viewer. Nat Biotechnol. 2011 Jan;29(1):24–6.
19. <https://artic.network/ncov-2019/ncov2019-bioinformatics-sop.html>. (accessed on 24 March 2020).
20. <https://nextstrain.org/blog/2020-06-02-SARSCoV2-clade-naming>. (accessed on 01 July 2020)
21. Mokili JL, Rohwer F, Dutilh BE. Metagenomics and future perspectives in virus discovery. Curr Opin Virol. 2012 Feb;2(1):63–77.
22. <https://artic.network/resources/ncov/ncov-amplicon-v3.pdf>. (accessed on 24 March 2020).
23. <https://pangolin.cog-uk.io/>. (accessed on 01 July 2020)
24. Batty EM, Kochakarn T, Wangwiwatsin A, Joonlasak K, Huang AT, Panthan B, et al. Comparing library preparation methods for SARS-CoV-2 multiplex amplicon sequencing on the Illumina MiSeq platform. bioRxiv. 2020 Jun 16;2020.06.16.154286.
25. Freed NE, Vlková M, Faisal MB, Silander OK. Rapid and Inexpensive Whole-Genome Sequencing of SARS-CoV2 using 1200 bp Tiled Amplicons and Oxford Nanopore Rapid Barcoding. bioRxiv. 2020 Jun 2;2020.05.28.122648.
26. Paden CR, Tao Y, Queen K, Zhang J, Li Y, Uehara A, et al. Early Release - Rapid, Sensitive, Full-Genome Sequencing of Severe Acute Respiratory Syndrome Coronavirus 2 - Volume 26, Number 10—October 2020 - Emerging Infectious Diseases journal - CDC. [cited 2020 Jul 3]; Available from: [https://wwwnc.cdc.gov/eid/article/26/10/20-1800\\_article](https://wwwnc.cdc.gov/eid/article/26/10/20-1800_article)

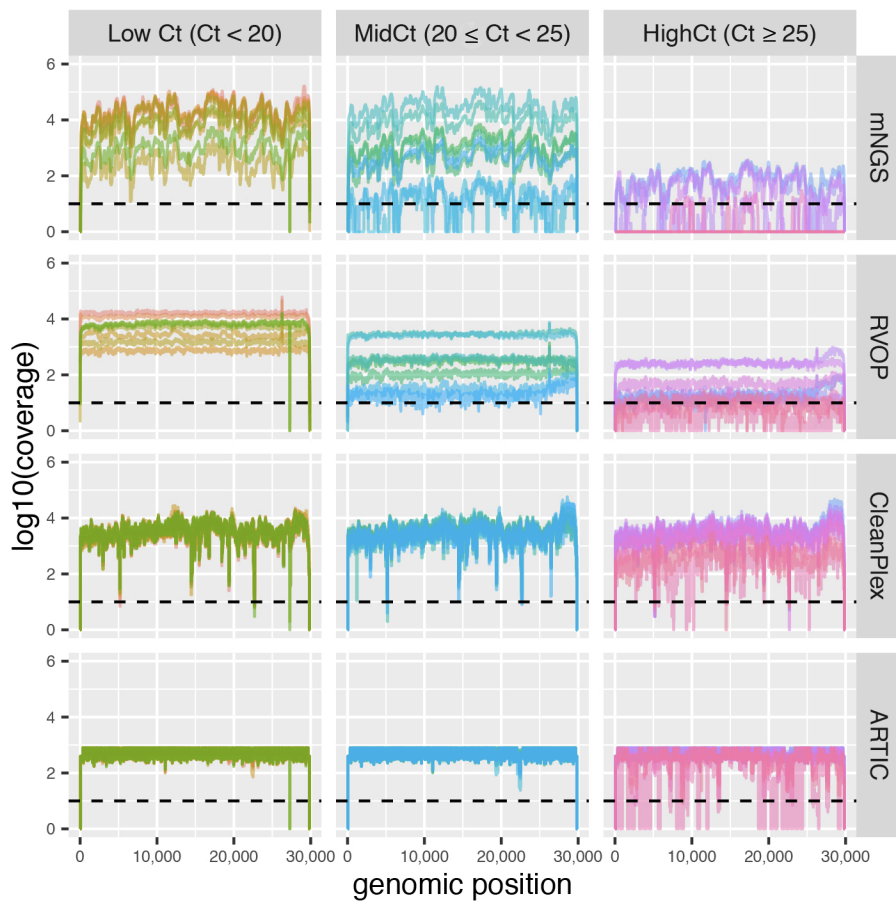



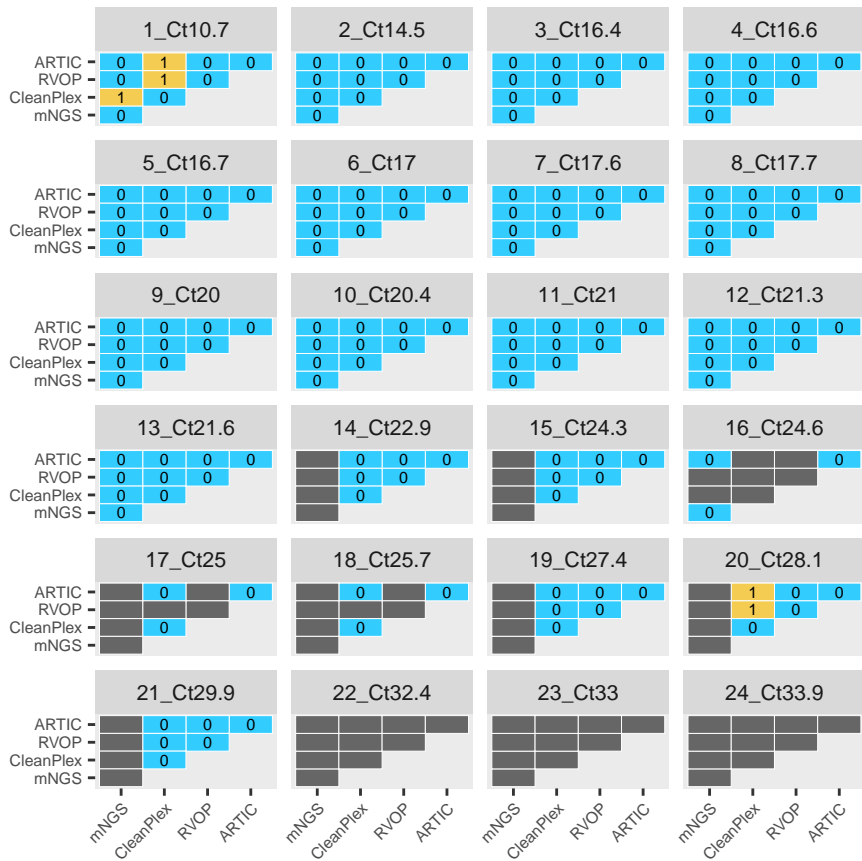

Source: https://www.biorxiv.org/content/10.1101/2020.07.14.201947v1.full.pdf
